# Supplementary material
Source: PubMed Central journal article supplement (PMC2763371)

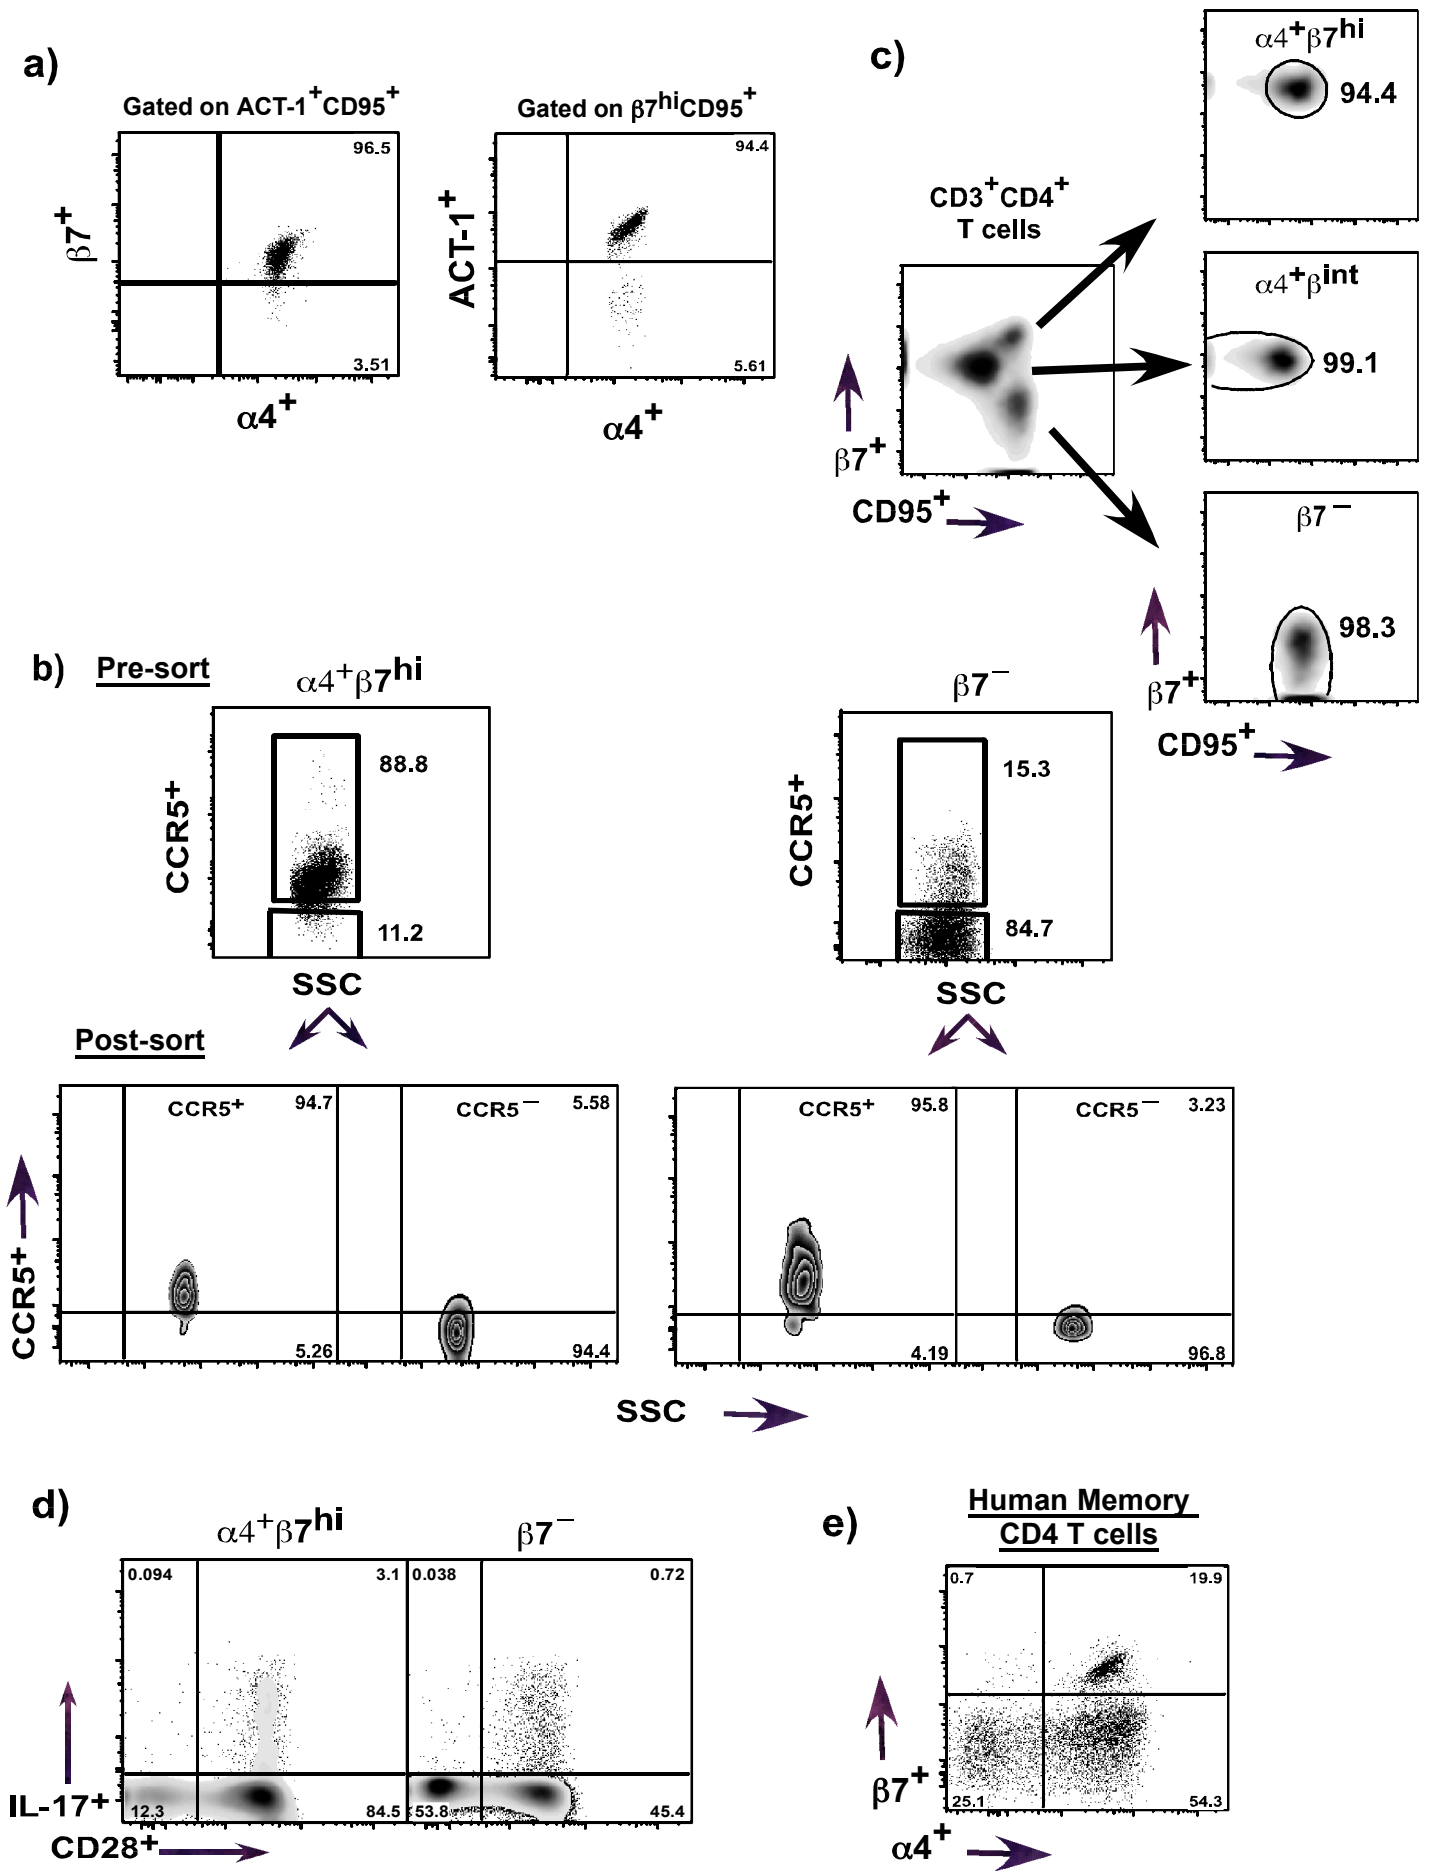

Supplement: NIHMS124757-supplement-Supp_figure.pdf [file NIHMS124757-supplement-Supp_figure.pdf]
